# Supplementary material
Source: publisher site journal article supplement (https://www.kjim.org/upload/media/kjim-2018-438-suppl1.pdf)
Supplement: Supplementary file 1 [file kjim-2018-438-suppl1.pdf]

**Supplementary Table 1. Components of scoring systems in patients with critically ill**

| Scoring systems                             | Items                                   |            |                                 |                                                                       |                   |                                                                  |              |
|---------------------------------------------|-----------------------------------------|------------|---------------------------------|-----------------------------------------------------------------------|-------------------|------------------------------------------------------------------|--------------|
| qSOFA [20]                                  | Respiratory rate $\geq 22$ /min         |            |                                 |                                                                       |                   |                                                                  |              |
|                                             | Altered mentation                       |            |                                 |                                                                       |                   |                                                                  |              |
|                                             | Systolic blood pressure $\geq 100$ mmHg |            |                                 |                                                                       |                   |                                                                  |              |
| MEWS [11]                                   | 3 Point                                 | 2 Point    | 1 Point                         | 0 Point                                                               | 1 Point           | 2 Point                                                          | 3 Point      |
| Systolic blood pressure, mmHg               | $\leq 70$                               | 71 to 80   | 81 to 100                       | 101 to 199                                                            |                   | $\geq 200$                                                       |              |
| Heart rate, beats/min                       |                                         | $\leq 40$  | 41 to 50                        | 51 to 100                                                             | 101 to 110        | 111 to 129                                                       | $\geq 130$   |
| Respiratory rate, breaths/min               |                                         | $< 9$      |                                 | 9 to 14                                                               | 15 to 20          | 21 to 29                                                         | $\geq 30$    |
| Temperature, °C                             |                                         | $< 35.0$   |                                 | 35.0 to 38.4                                                          |                   |                                                                  | $\geq 38.5$  |
| Conscious level                             |                                         |            |                                 | Alert                                                                 | Reacting to voice | Reacting to pain                                                 | Unresponsive |
| SOFA [21]                                   | 0 Point                                 | 1 Point    | 2 Point                         | 3 Point                                                               |                   | 4 Point                                                          |              |
| PaO <sub>2</sub> /FiO <sub>2</sub>          | $\geq 400$                              | $< 400$    | $< 300$                         | $< 200$ with respiratory support                                      |                   | $< 100$ with respiratory support                                 |              |
| Platelet, $\times 10^3/\mu\text{L}$         | $\geq 150$                              | $< 150$    | $< 100$                         | $< 50$                                                                |                   | $< 20$                                                           |              |
| Total bilirubin, mg/dL                      | $< 1.2$                                 | 1.2 to 1.9 | 2.0 to 5.9                      | 6.0 to 12.0                                                           |                   | $> 12.0$                                                         |              |
| Cardiovascular (hypotension)                | MAP $\geq 70$                           | MAP $< 70$ | Dopamine $\leq 5$ or dobutamine | Dopamine $> 5$ or epinephrine $\leq 0.1$ or norepinephrine $\leq 0.1$ |                   | Dopamine $> 15$ or epinephrine $> 0.1$ or norepinephrine $> 0.1$ |              |
| GCS                                         | 15                                      | 13 to 14   | 10 to 12                        | 6 to 9                                                                |                   | $< 6$                                                            |              |
| Creatinine (mg/dL) or urine output (mL/day) | $< 1.2$                                 | 1.2 to 1.9 | 2.0 to 3.4                      | 3.5 to 5.0<br>Urine output $< 500$                                    |                   | $> 5.0$<br>Urine output $< 200$                                  |              |

qSOFA, quick sepsis-related organ failure assessment; MEWS, modified early warning score; SOFA, sepsis-related organ failure assessment; MAP, mean arterial pressure; GCS, Glasgow coma scale.
